# Supplementary material
Source: Springer Nature journal article supplement (https://www.springermedizin.de/resource/supplementary/12936_2009_1152_MOESM2_ESM.pdf/9549984)

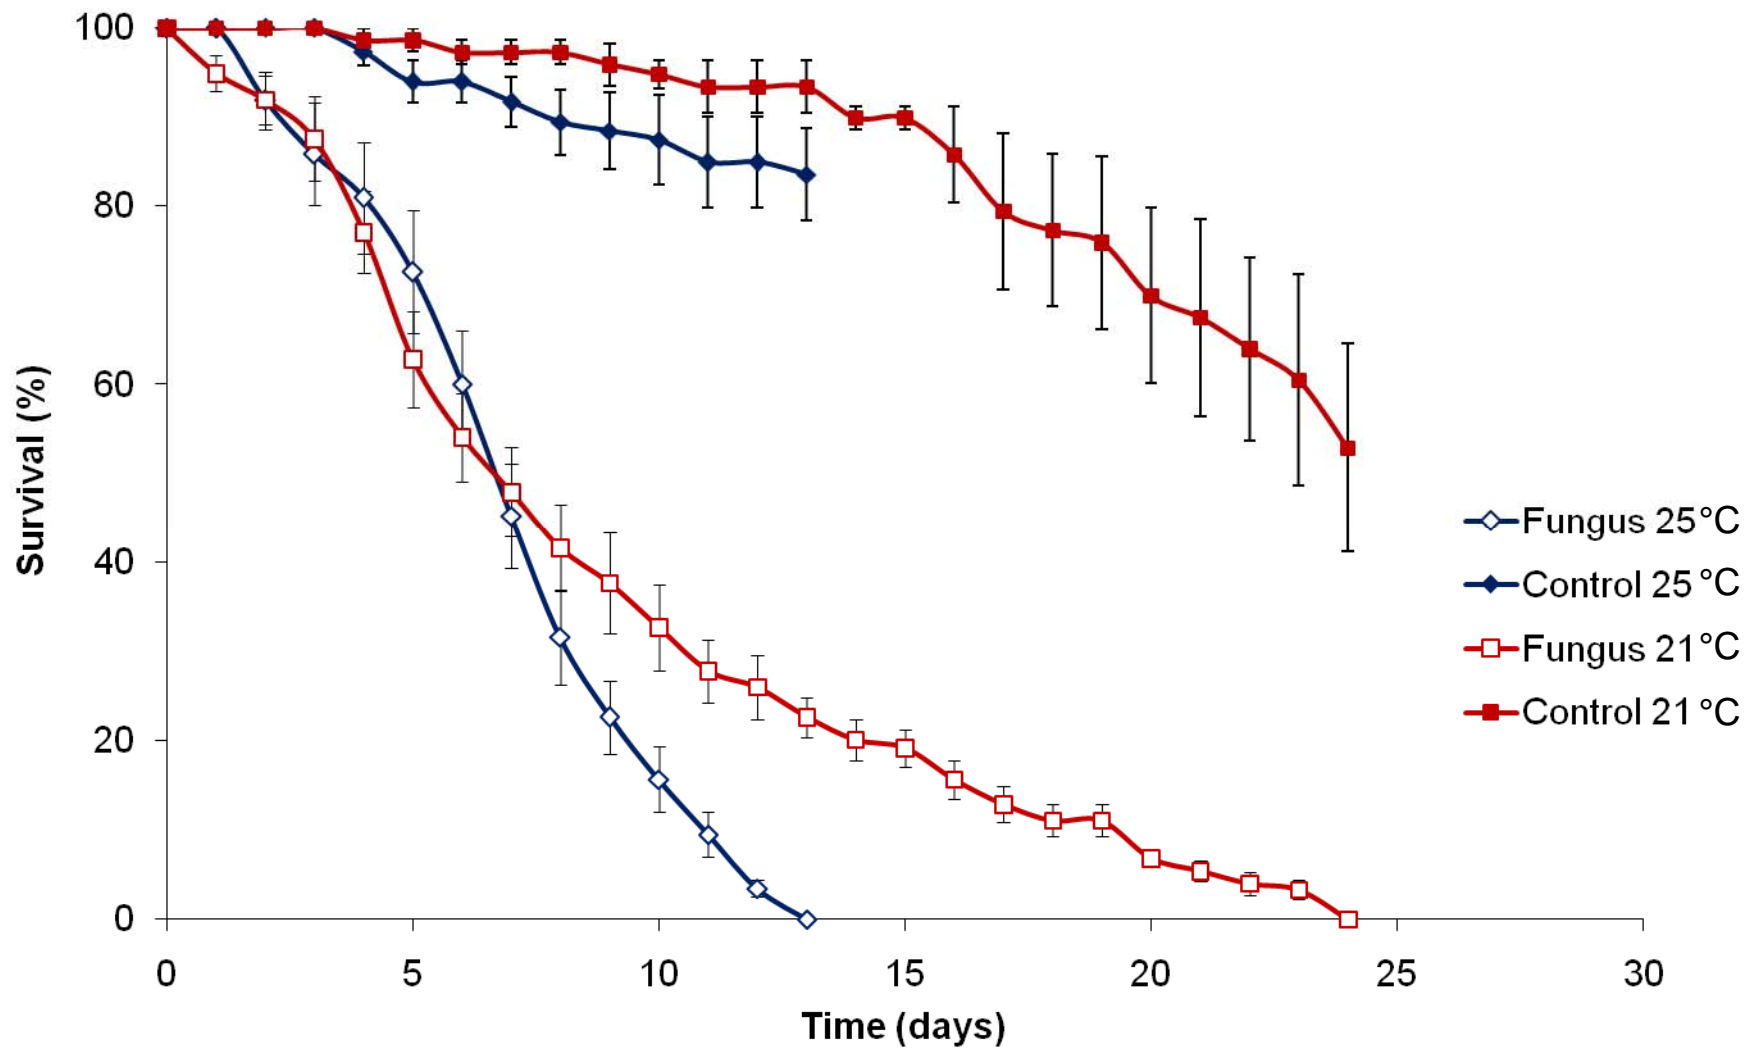

Supplement: MOESM2 [file 9549984]
